# Supplementary material for: Tumor heterogeneity assessed by texture analysis on contrast-enhanced CT in lung adenocarcinoma: association with pathologic grade
Source: PubMed Central journal article supplement (PMC5581139; doi:10.18632/oncotarget.15399), 2017-02-16
Supplement: oncotarget-08-53664-s001.pdf [file oncotarget-08-53664-s001.pdf]

## Tumor heterogeneity assessed by texture analysis on contrast-enhanced CT in lung adenocarcinoma: association with pathologic grade

### Supplementary Material

**Supplementary Table 1:** Quantitative feature category

| Feature category       | Name of the feature |                              |     |                         |
|------------------------|---------------------|------------------------------|-----|-------------------------|
| First-Order Statistics | F1                  | Energy                       | F8  | Mean Deviation          |
|                        | F2                  | Entropy                      | F9  | Root Mean Square        |
|                        | F3                  | Minimum Intensity            | F10 | Standard Deviation      |
|                        | F4                  | Maximum Intensity            | F11 | Skewness                |
|                        | F5                  | Mean Intensity               | F12 | Kurtosis                |
|                        | F6                  | Median Intensity             | F13 | Variance                |
|                        | F7                  | Range                        | F14 | Uniformity              |
| Morphology and Shape   | F15                 | Volume cc                    | F19 | Compactness 2           |
|                        | F16                 | Surface Area mm <sup>2</sup> | F20 | Maximum 3D Diameter     |
|                        | F17                 | Surface: Volume Ratio        | F21 | Spherical Disproportion |
|                        | F18                 | Compactness 1                | F22 | Sphericity              |
| Texture: GLCM          | F23                 | Autocorrelation              | F33 | Homogeneity 1           |
|                        | F24                 | Cluster Prominence           | F34 | Homogeneity 2           |
|                        | F25                 | Cluster Shade                | F35 | IMC1                    |
|                        | F26                 | Cluster Tendency             | F36 | IDMN                    |
|                        | F27                 | Contrast                     | F37 | IDN                     |
|                        | F28                 | Correlation                  | F38 | Inverse Variance        |
|                        | F29                 | Difference Entropy           | F39 | Maximum Probability     |
|                        | F30                 | Dissimilarity                | F40 | Sum Average             |
|                        | F31                 | Energy (GLCM)                | F41 | Sum Entropy             |
|                        | F32                 | Entropy(GLCM)                | F42 | Sum Variance            |
| Texture: GLRL          |                     |                              | F43 | Variance (GLCM)         |
|                        | F44                 | SRE                          | F49 | LGLRE                   |
|                        | F45                 | LRE                          | F50 | HGLRE                   |
|                        | F46                 | GLN                          | F51 | SRLGLE                  |
|                        | F47                 | RLN                          | F52 | SRHGLE                  |
|                        | F48                 | RP                           | F53 | LRLGLE                  |
|                        |                     |                              | F54 | LRHGLE                  |
